# Supplementary figures and images for: Microwave Assisted Extraction of Defatted Roselle (Hibiscus sabdariffa L.) Seed at Subcritical Conditions with Statistical Analysis
Source: Hindawi journal article supplement (doi:10.1155/2017/5232458), 2017-01-01

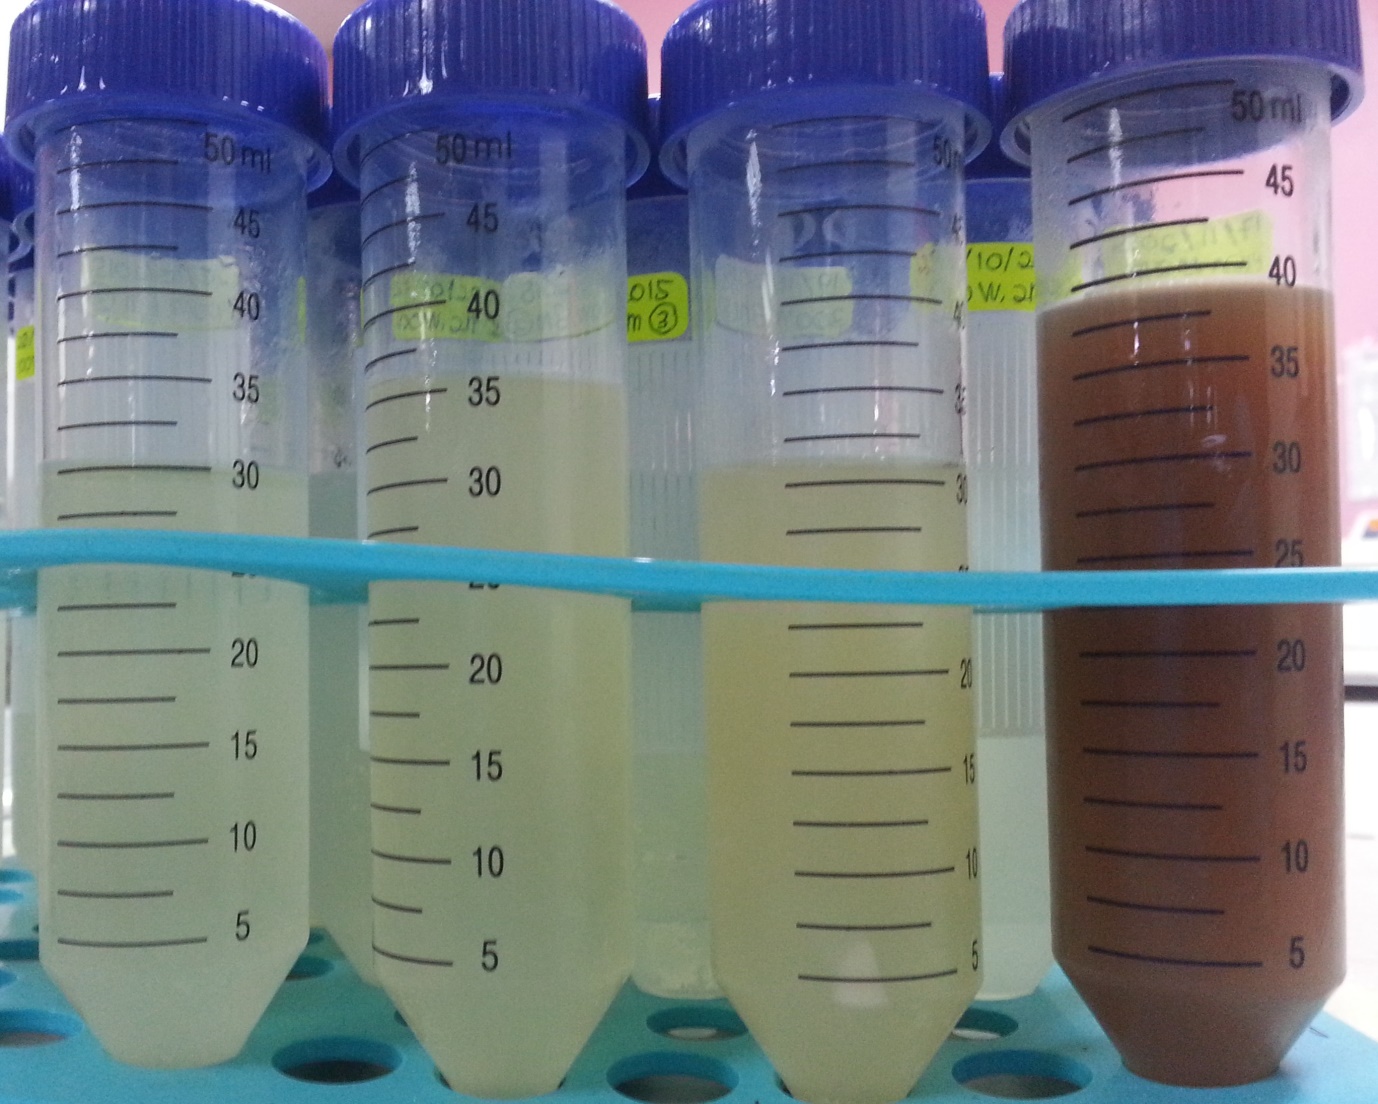


**400 W**

**300 W**

**200 W**

**100 W**

**Figure S1**: Extraction samples at different microwave power

Supplement: f1 [file 5232458.f1.docx]
